# Supplementary material
Source: publisher figshare collection journal article supplement (https://acs.figshare.com/ndownloader/files/3609213)

## Supporting Information

### Identification and Synthesis of Quinolizidines with Anti-Influenza A Virus Activity

Zhao Dang,<sup>†</sup> Katherine Jung,<sup>†</sup> Lei Zhu,<sup>†</sup> Weihong Lai,<sup>†</sup> Hua Xie,<sup>#</sup> Kuo-Hsiung Lee,<sup>‡,§</sup> Li Huang,<sup>\*,†</sup> and Chin-Ho Chen<sup>\*,†</sup>

<sup>†</sup>Surgical Science, Department of Surgery, Duke University Medical Center, Durham, North Carolina 27710, USA

<sup>#</sup>School of Dentistry, Meharry Medical College, Nashville, Tennessee 37208, USA

<sup>‡</sup>Natural Products Research Laboratories, Eshelman School of Pharmacy, University of North Carolina, Chapel Hill, North Carolina 27599, USA

<sup>§</sup>Chinese Medicine Research and Development Center, China Medical University and Hospital, Taichung, Taiwan.

## EXPERIMENTAL SECTION

### Material.

Chemicals including compounds and synthetic reagents were purchased from Sigma-Aldrich if unspecified. The (+)- and (-)-sparteine were purchased from AEchem Scientific Corp. and Annova Chem Inc.; respectively. Methyl cytosine was purchased from Santa Cruz Biotechnology. Oseltamivir and amantadine were purchased from Tszchem and LKT laboratories and Sigma-Aldrich, respectively. The IAV VR1679 and MDCK cells were obtained from ATCC and the PR8 (A/Puerto Rico/8/34) virus was kindly provided by Dr. Elizabeth Ramsburg at Duke University.

### Methods.

**Anti-influenza virus assay.** MDCK cells at 5,000 cells/well were cultured in 96-well plates for a day before IAV infection. The infection medium was MEM containing 1% FBS, 1  $\mu$ g/mL trypsin (Sigma-Aldrich), 1 mM sodium pyruvate, 0.1 mM non-essential amino acid, and 100 U/mL penicillin/streptomycin. Various concentrations of compounds were added to the cell culture. Then the cells were infected with IAV at a multiplicity of infection (MOI) of 1, unless otherwise indicated. After 48 hours of incubation, Promega CellTiter-Glo® reagent was added to each well following the protocol provided by the supplier. The luminescence (RLU) emitted from each well was quantified with a Promega Victor III plate reader. The % protection of MDCK cells from the cytotoxic effect of the flu virus was calculated by the following formula:  $100 \times [(RLU_{vs} - RLU_v) / (RLU_{ctr} - RLU_v)]$ , where  $RLU_{vs}$  is the relative luminescence unit (RLU) from the cells cultured with virus and compounds,  $RLU_v$  is the RLU from the flu virus infected cells only, and  $RLU_{ctr}$  is the cells cultured in the absence of virus and compounds.

EC<sub>50</sub>, the concentration required to protect 50% of MDCK cells from the cytotoxic effect of flu viruses, was calculated using the software CalcuSyn (Biosoft, Cambridge, UK).

**Immunostaining and confocal microscopy.** MDCK cells cultured in 96-well glass-bottom plates were treated with compounds and infected with IAV (MOI = 1) for 6 hours. The cells were fixed with 4% formaldehyde in PBS for 15 minutes. The cells were then treated with a blocking buffer containing 5% FBS and 0.3% Triton X-100 in PBS for 60 min. Immunostaining was carried out by incubating FITC-conjugated anti-influenza A NP antibody (Thermo Fisher Scientific) with the cells at 4°C overnight. The samples were washed three times in PBS before treated with Prolong<sup>®</sup> Gold Anti-Fade Reagent with DAPI (Cell Signaling Technology). Confocal images were acquired using a Nikon TE2000-U laser-scanning confocal microscope. Confocal image analysis was performed with NIS-Elements AR 3.0 software.

## **Chemistry.**

**General.** Compounds (**9** - **16**) (all new except **9**) were synthesized and analyzed with positive HR-FABMS on a Shimadzu LCMS-IT-TOF or a Joel SX-102 mass spectrometer. <sup>1</sup>H, <sup>13</sup>C and 2D NMR spectra were measured on a Varian 400 or 800 MHz spectrometer as indicated. Samples were dissolved in CD<sub>3</sub>OD unless indicated otherwise. Silica gel chromatography was carried out on an ISCO CombiFlash Rf flash chromatograph system with a pre-packed Redi Sep Rf Si gel column (Teledyne ISCO) and mobile phase of EtOAc/MeOH/NH<sub>4</sub>OH in gradient of increased polarity. Compounds were purified on HPLC using a Varian ProStar HPLC system with a PDA detector and Agilent Zorbax C18 columns (5 μM particle size, 4.6 × 250 mm or 9.4 × 250 mm). The mobile phase used for the HPLC was ACN/MeOH/H<sub>2</sub>O/TFA in a gradient of decreasing polarity. All synthesized compounds were confirmed a purity of over 95% by HPLC.

**Synthesis of compounds 9 – 14.** To a mixture of **1** (46 mg, 0.2 mmol) and isobutyraldehyde (43 mg, 0.6 mmol) in 2 mL 1, 2-dichloroethane was added sodium triacetoxyborohydride (60 mg, 0.28 mmol) at room temperature. The reaction mixture was stirred under N<sub>2</sub> for 5 hours and was then diluted with ethyl acetate. The organic layer was washed with saturated NaHCO<sub>3</sub>, dried over MgSO<sub>4</sub>, and concentrated. The residue was chromatographed with Si-gel chromatography to give **11** with 73% yield. Compound **9**, **10**, and **12 - 14** were synthesized by same method with 23-72% yield.

**Synthesis of compound 15:** To a mixture of **1** (116 mg, 0.5 mmol) in 5 mL acetonitrile was added 2-(Boc-amino) ethyl bromide (112 mg, 0.5 mmol) and K<sub>2</sub>CO<sub>3</sub> (210 mg, 1.5 mmol). The mixture was heated to 110 °C by microwave (Biotage Initiator) for 1 hour. After the solvent was removed under vacuum, the resultant residue was diluted with ethyl acetate, which was then washed with water and brine, dried over MgSO<sub>4</sub>, and concentrated. The residue was chromatographed with Si-gel chromatography to give **1a** (35% yield).

To **1a** (38 mg, 0.1 mmol) was added 55%TFA/DCM (1 mL). The mixture was stirred at rt for 20 minutes. After the solvent was removed in vacuum, the resultant residue was chromatographed with Si-gel chromatography to give **1b** (87% yield).

To **1b** (19 mg, 0.069 mmol) and 2-fluorobenzoic acid (21 mg, 0.15 mmol) in 3 mL THF was added EDC (30 mg, 0.15 mmol) and DIEA (52 µL, 0.3 mmol) at room temperature. The mixture was stirred under N<sub>2</sub> overnight. After the solvent was removed in vacuum, the resultant residue was dissolved in ethyl acetate, washed with water and brine, dried over MgSO<sub>4</sub>, and concentrated to give a solid. The residue was chromatographed with Si-gel and then with HPLC to give **15** (36% yield).

**Synthesis of compound 16:** To a mixture of **1** (24 mg, 0.1 mmol) and thiophene-2,5-dicarboxylic acid (26 mg, 0.15 mmol) in 3 mL THF was added EDC (30 mg, 0.15 mmol) and DIEA (52  $\mu$ L, 0.3 mmol) at room temperature. The mixture was stirred under N<sub>2</sub> for overnight. After the solvent was removed in vacuum, the resultant residue was diluted with ethyl acetate, washed with water and brine, dried over MgSO<sub>4</sub>, and concentrated to give a solid. The residue was chromatographed with Si-gel and further purified with HPLC to give **16** (5% yield).

**Synthesis of compounds 17 and 18:** To a mixture of **9** (180 mg, 0.73mmol) in 10 mL methanol was added 10% Pd/C (36 mg, 20% w/w) at room temperature. The mixture was stirred under H<sub>2</sub> for 5 hours. The catalyst was removed by filtration while the liquid part was concentrated to give a crude product, which was subsequently chromatographed with HPLC to give separated **17** (38% yield) and **18** (55%yield). The *cis* and *trans* configuration of decahydroquinoline substructure (C7-8-9-11-12-13-14-15-16-17) in **17** and **18** were determined based on NMR data. From the proton NMR data, the H11 in *cis* configuration (H11/H16) appeared more deshielding than in that in *trans*, suggesting **17** with H11 at  $\delta$  3.19 ppm has *cis*, while **18** at 3.03 ppm has *trans* configuration, respectively (1). In addition, the multiplicity of H11 resonance in **18** is consistent with *trans* decahydroquinoline model, with vicinal proton (H16) oriented in 180 degree in dihedral angle. The H11 signal in **18** located at the 3.03 ppm is a multiplicity with large coupling constants, consistent with coupling patterns of *trans* configuration. On the other hand, H11 (axial) resonance in **17** is a slightly broad singlet, consistent with *cis* decahydroquinoline with vicinal proton (H16 in equat.) oriented approximately 90 degree (2). In <sup>13</sup>C NMR spectra, the chemical shifts of C16 and C11 are located at  $\delta$  31.8 and 72.5 ppm for **18**, and at 27.1 and

67.5 ppm for **17**, which agree with reported decahydroquinoline models that the chemical shifts of these two conjunction carbons appeared at lower fields in *trans* than in *cis* isomers (3).

**N-Methylaloperine (9):**  $^1\text{H}$  NMR (400 MHz) ( $\text{CDCl}_3$ )  $\delta$  5.52 (dd, 1H,  $J = 8.4$  Hz,  $J = 2.0$  Hz), 2.57-2.88 (m, 4H), 2.32-2.43 (m, 2H), 2.24 (s, 3H), 2.18 (dd, 1H,  $J = 12.4$  Hz,  $J = 5.6$  Hz), 1.91-2.11 (m, 4H), 1.74 (m, 1H), 1.65-1.74 (m, 2H), 1.53-1.63 (m, 4H), 1.37-1.44 (m, 2H), 1.26-1.35 (m, 1H), 1.21 (dd, 1H,  $J = 15.6$  Hz,  $J = 4.8$  Hz). Calcd for  $\text{C}_{16}\text{H}_{27}\text{N}_2$  ( $\text{M}+\text{H}$ ) $^+$ : 247.2. Found: 247.1.

**N-Ethylaloperine (10):**  $^1\text{H}$  NMR (400 MHz) ( $\text{CDCl}_3$ )  $\delta$  5.52 (dd, 1H,  $J = 6.0$  Hz,  $J = 2.0$  Hz), 2.60-2.95 (m, 6H), 2.42 (d, 1H,  $J = 9.6$  Hz), 2.38 (d, 1H,  $J = 9.6$  Hz), 1.18-2.25 (m, 16H), 0.99 (t, 3H,  $J = 9.2$  Hz). Calcd for  $\text{C}_{17}\text{H}_{29}\text{N}_2$  ( $\text{M}+\text{H}$ ) $^+$ : 261.2325. Found: 261.2328.

**N-Isobutylaloperine (11):**  $^1\text{H}$  NMR (400 MHz)  $\delta$  5.95 (d, 1H,  $J = 6.4$  Hz), 4.20 (d, 1H,  $J = 4.4$  Hz), 3.89 (d, 2H,  $J = 10.8$  Hz), 3.49 (d, 1H,  $J = 12.4$  Hz), 3.14-3.31 (m, 4H), 3.08 (dt, 1H,  $J = 12.8$  Hz,  $J = 3.2$  Hz), 2.93-2.99 (m, 2H), 2.29-2.52 (m, 4H), 2.16 (ddd, 1H,  $J = 13.2$  Hz,  $J = 12.4$  Hz,  $J = 13.2$  Hz), 1.76-2.05 (m, 8H), 1.60 (ddd, 1H,  $J = 13.2$  Hz,  $J = 13.2$  Hz,  $J = 12.4$  Hz), 1.16 (d, 3H,  $J = 6.0$  Hz), 1.08 (d, 3H,  $J = 6.0$  Hz). Calcd for  $\text{C}_{19}\text{H}_{33}\text{N}_2$  ( $\text{M}+\text{H}$ ) $^+$ : 289.2638. Found: 289.2636.

**N-Cyclopropanemethylaloperine (12):**  $^1\text{H}$  NMR (400 MHz)  $\delta$  5.52 (d, 1H,  $J = 6.4$  Hz), 3.26 (m, 1H), 2.92-3.01 (m, 2H), 2.60-2.78 (m, 5H), 2.31-2.50 (m, 3H), 2.10-2.21 (m, 3H), 1.84-2.02 (m, 5H), 1.19-1.76 (m, 10H), 0.91 (m, 1H), 0.43-0.48 (m, 2H), 0.11 (m, 2H). Calcd for  $\text{C}_{19}\text{H}_{31}\text{N}_2$  ( $\text{M}+\text{H}$ ) $^+$ : 287.2482. Found: 287.2486.

**N-Cyclobutanemethylaloperine (13):**  $^1\text{H}$  NMR (400 MHz)  $\delta$  5.94 (d, 1H,  $J = 5.6$  Hz), 4.18 (d, 1H,  $J = 6.8$  Hz), 3.86 (dd, 1H,  $J = 5.6$  Hz,  $J = 19.2$  Hz), 3.66 (d, 1H,  $J = 16.0$ ), 3.27-3.47 (m,

4H), 3.03-3.14 (m, 2H), 2.88-2.96 (m, 2H), 1.52-2.50 (m, 20H). Calcd for  $C_{20}H_{33}N_2$  (M+H)<sup>+</sup>: 301.2638. Found: 301.2645.

***N*-Cyclohexanemethylaloperine (14):** <sup>1</sup>H NMR (400 MHz)  $\delta$  5.95 (d, 1H,  $J$  = 6.0 Hz), 4.19 (d, 1H,  $J$  = 4.8 Hz), 3.90 (d, 2H,  $J$  = 14.0 Hz), 3.49 (d, 1H,  $J$  = 12.4 Hz), 3.17-3.31 (m, 4H), 3.08 (dt, 1H,  $J$  = 12.8 Hz,  $J$  = 12.4 Hz,  $J$  = 3.2 Hz), 2.98 (wide s, 1H), 2.87 (dd, 1H,  $J$  = 12.4 Hz,  $J$  = 3.2 Hz), 1.55-2.52 (m, 18H), 1.02-1.145 (m, 6H). Calcd for  $C_{22}H_{37}N_2$  (M+H)<sup>+</sup>: 329.2951. Found: 329.2951.

**2-Fluoro-*N*-[2-(*N'*-aloperine-yl)ethyl]benzamide (15):** <sup>1</sup>H NMR (400 MHz)  $\delta$  7.78 (dt, 1H,  $J$  = 10.0 Hz,  $J$  = 2.0 Hz), 7.49-7.57 (m, 1H), 7.26 (dt, 1H,  $J$  = 10.0 Hz,  $J$  = 1.6 Hz), 7.18 (ddd, 1H,  $J$  = 15.2 Hz,  $J$  = 11.2 Hz,  $J$  = 1.2 Hz), 5.91 (d, 1H,  $J$  = 6.8 Hz), 4.26 (d, 1H,  $J$  = 8.8 Hz), 3.80-3.93 (m, 4H), 3.67 (m, 1H), 2.97-3.45 (m, 8H), 1.48-2.53 (m, 13H). Calcd for  $C_{24}H_{33}FN_3O$  (M+H)<sup>+</sup>: 398.2602. Found: 398.2602.

***N,N'*-Di-aloperine-yl thiophene-2,5-dicaboximide (16):** <sup>1</sup>H NMR (400 MHz)  $\delta$  7.47 (s, 2H), 5.47 (wide s, 2H), 4.18 (dd, 2H,  $J$  = 16.8 Hz,  $J$  = 6.4 Hz), 3.83 (d, 1H,  $J$  = 7.9 Hz), 3.79 (d, 1H,  $J$  = 6.8 Hz), 3.20-3.45 (m, 12H), 2.87 (m, 2H), 2.32-2.58 (m, 6H), 2.14-2.30 (m, 4H), 1.55-2.10 (m, 16H). Calcd for  $C_{36}H_{49}N_4O_2S$  (M+H)<sup>+</sup>: 601.3576. Found: 601.3573.

***N*-Methyl-11,16-*cis*-dihydroaloperine (17):** <sup>1</sup>H NMR (800 MHz)  $\delta$  3.66 (dd, 1H,  $J$  = 13.9 Hz,  $J$  = 11.4 Hz, H10a), 3.53 (dt, 1H,  $J$  = 12.0 Hz,  $J$  = 1.8 Hz,  $J$  = 1.8 Hz, H13a), 3.45 (dt, 1H,  $J$  = 12.0 Hz,  $J$  = 1.8 Hz,  $J$  = 1.8 Hz, H2a), 3.19 (s, 1H, H11), 3.11 (d, 1H,  $J$  = 13.0 Hz, H6), 3.10 (td, 1H,  $J$  = 12.7 Hz,  $J$  = 12.7 Hz,  $J$  = 4.8 Hz, H13b), 3.06 (t, 1H,  $J$  = 12.0 Hz, H2b), 3.05 (dd, 1H,  $J$  = 12.0 Hz,  $J$  = 3.0 Hz, H16), 2.91 (s, 3H, NCH<sub>3</sub>), 2.87 (dd, 1H,  $J$  = 14.1 Hz,  $J$  = 3.1 Hz, H10b), 2.68 (dd, 1H,  $J$  = 10.2 Hz,  $J$  = 2.9 Hz, H9), 2.08 (s, 1H, H7), 1.76-2.00 (m, 9H, H3b, H4a, H4b, H5a, H8a, H14a, H14b, H15a, H17a), 1.73 (d, 1H,  $J$  = 13.0 Hz, H5b), 1.71 (d, 1H,  $J$  = 14.0 Hz,

H15b), 1.66 (d, 1H,  $J = 15.4$  Hz, H8b), 1.62 (ddt, 1H,  $J = 13.0$  Hz,  $J = 13.0$  Hz,  $J = 13.0$  Hz,  $J = 3.7$  Hz,  $J = 3.7$  Hz, H3b), 1.49 (d, 1H,  $J = 13.9$  Hz, H17b).  $^{13}\text{C}$  NMR (200 MHz)  $\delta$  67.5 (C11), 65.9(C6), 59.0(C13), 56.0(C2), 52.9(C10), 42.0(NMe), 34.0(C7), 33.0(C5), 30.3(C17), 28.3(C15), 27.1(C16), 26.3(C9), 24.2(C4), 23.6(C3), 20.3(C14), 18.6(C8). Calcd for  $\text{C}_{16}\text{H}_{29}\text{N}_2$  (M+H) $^+$ : 249.2325. Found: 249.2328.

***N*-Methyl-11,16-*trans*-dihydroaloperine (18):**  $^1\text{H}$  NMR (800 MHz)  $\delta$  3.62 (dd, 1H,  $J = 13.6$  Hz,  $J = 10.4$  Hz, H10a), 3.56 (d, 1H,  $J = 12.0$  Hz, H13a), 3.45 (d, 1H,  $J = 13.6$  Hz, H2a), 3.24 (dd, 1H,  $J = 14.4$  Hz,  $J = 2.4$  Hz, H10b), 3.10 (td, 1H,  $J = 12.2$  Hz,  $J = 12.2$  Hz,  $J = 4.7$  Hz, H13b), 3.03-3.08 (m, 3H, H2b, H6, H9), 3.03 (dd, 1H,  $J = 12.0$  Hz,  $J = 2.9$  Hz, H11), 2.84 (s, 3H, NCH<sub>3</sub>), 2.24 (ddt, 1H,  $J = 11.7$  Hz,  $J = 11.4$  Hz,  $J = 11.4$  Hz,  $J = 3.6$  Hz,  $J = 3.6$  Hz, H16), 2.19 (dd, 1H,  $J = 14.8$  Hz,  $J = 2.8$  Hz, H8a), 1.96 (d, 1H,  $J = 15.0$  Hz, H5a), 1.92-1.96 (m, 5H, H4a, H4b, H7, H14a, H14b), 1.87 (d, 1H,  $J = 15.8$  Hz, H3a), 1.83 (dd, 1H,  $J = 14.4$  Hz,  $J = 3.1$  Hz, H15a), 1.81 (dd, 1H,  $J = 11.2$  Hz,  $J = 4.1$  Hz, H17a), 1.70 (ddd, 1H,  $J = 13.3$  Hz,  $J = 13.3$  Hz,  $J = 13.3$  Hz,  $J = 2.9$  Hz, H5b), 1.64 (ddt, 1H,  $J = 13.0$  Hz,  $J = 13.0$  Hz,  $J = 13.0$  Hz,  $J = 3.5$  Hz,  $J = 3.4$  Hz, H3b), 1.59 (d, 1H,  $J = 14.8$  Hz, H8b), 1.42 (dq, 1H,  $J = 11.2$  Hz,  $J = 12.5$  Hz,  $J = 12.2$  Hz,  $J = 5.9$  Hz, H15b), 1.35 (dt, 1H,  $J = 13.0$  Hz,  $J = 13.0$  Hz,  $J = 3.3$  Hz, H17b).  $^{13}\text{C}$  NMR (200 MHz)  $\delta$  72.5(C11), 66.2(C6), 58.7(C13), 56.1(C2), 50.5(C10), 40.8(NMe), 36.9(C17), 33.8(C7), 31.8(C16), 33.0(C5), 30.4(C15), 27.1(C9), 25.6(C8), 24.3(C4), 24.1(C14), 23.5 (C3). Calcd for  $\text{C}_{16}\text{H}_{29}\text{N}_2$  (M+H) $^+$ : 249.2325. Found: 249.2328.



## References.

- (1) Abdel-Magid, A. F.; Carson, K. G.; Harris, B. D.; Maryanoff, C. A.; Shah, R. D. Reductive amination of aldehydes and ketones with sodium triacetoxyborohydride. Studies on direct and indirect reductive amination procedures(1). *J. Org. Chem.* **1996**, *61*, 3849–3862.
- (2) Mena, M.; Bonjoch, J. Model studies in the lepadin series: Synthesis of enantiopure decahydroquinolines by aminocyclization of 2-(3-aminoalkyl)cyclohexenones. *Tetrahedron* **2005**, *61*, 8264–8270.
- (3) Diaba, F.; Ricou, E.; Bonjoch, J. New insights into NIS-promoted aminocyclization. Synthesis of decahydroquinolines from 2-allylcyclohexylamines. *Org. Lett.* **2007**, *9*, 26332–26636.

**NMR profiles of synthesized quinolizidines.**

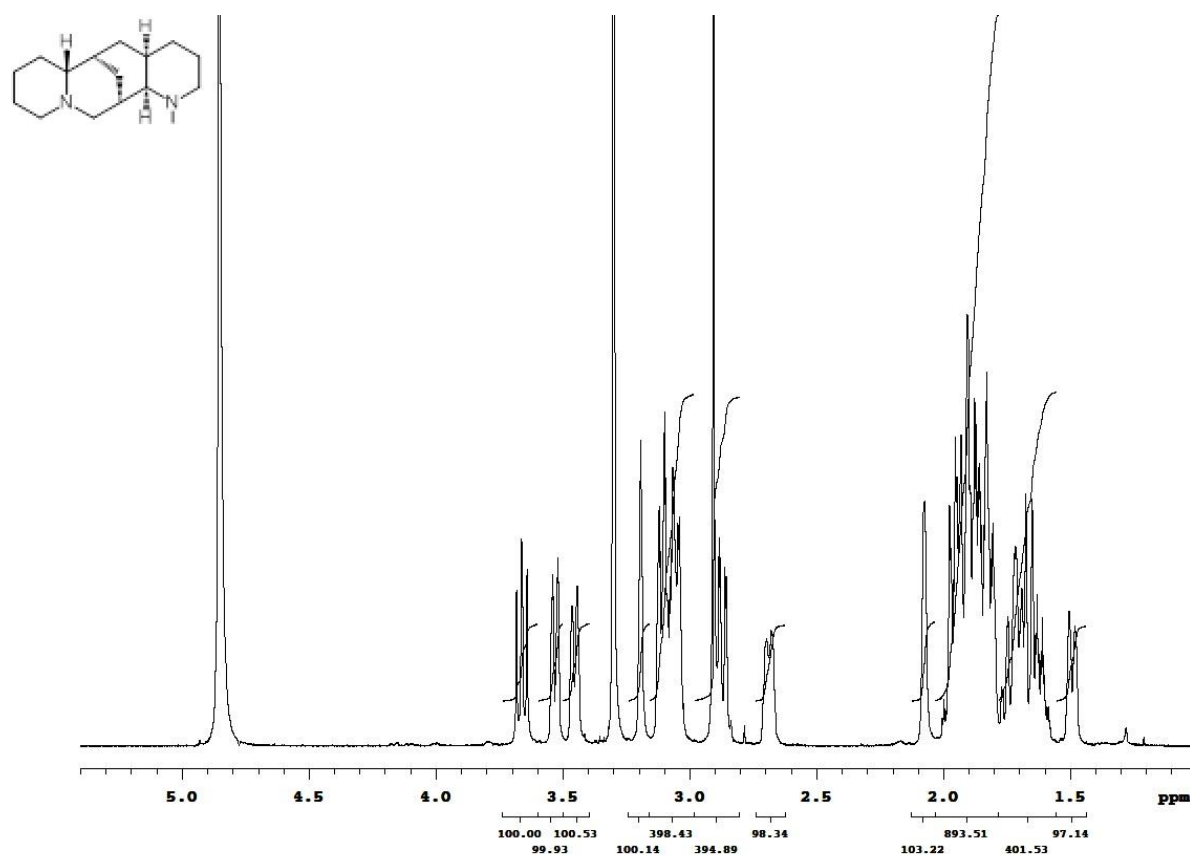

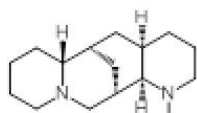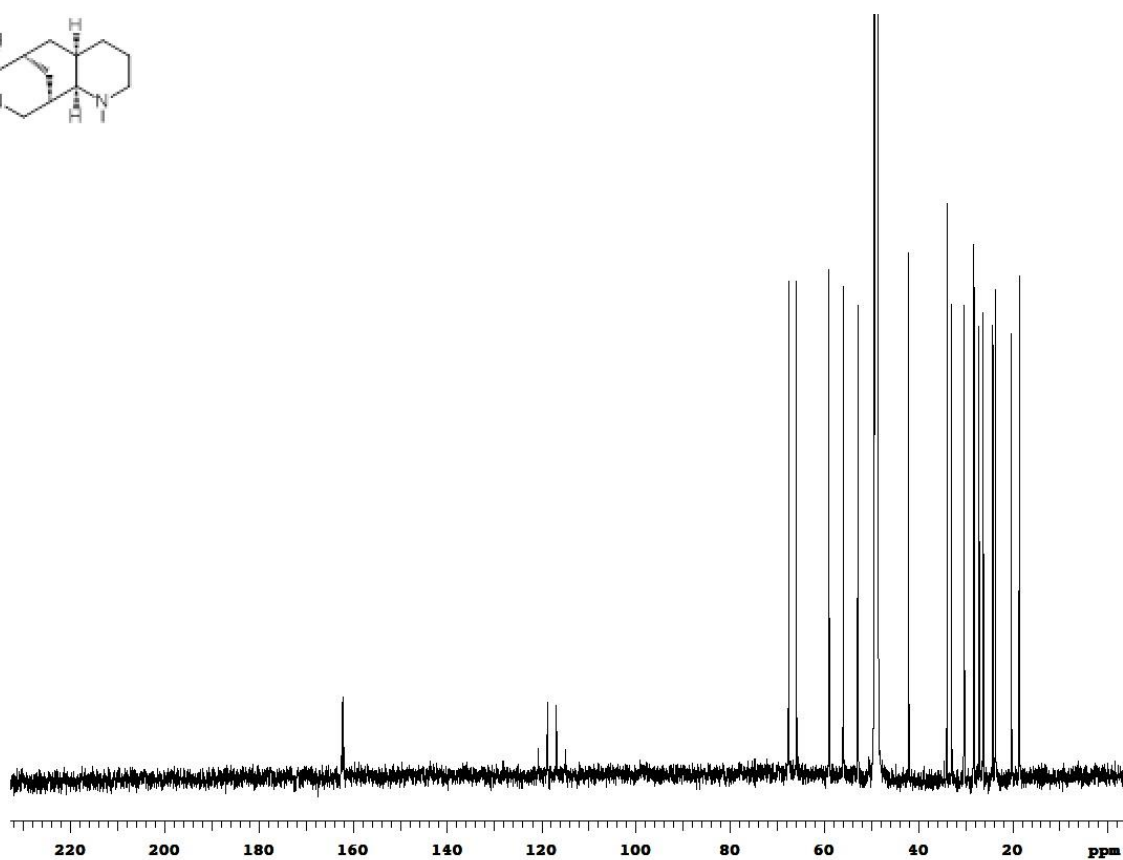

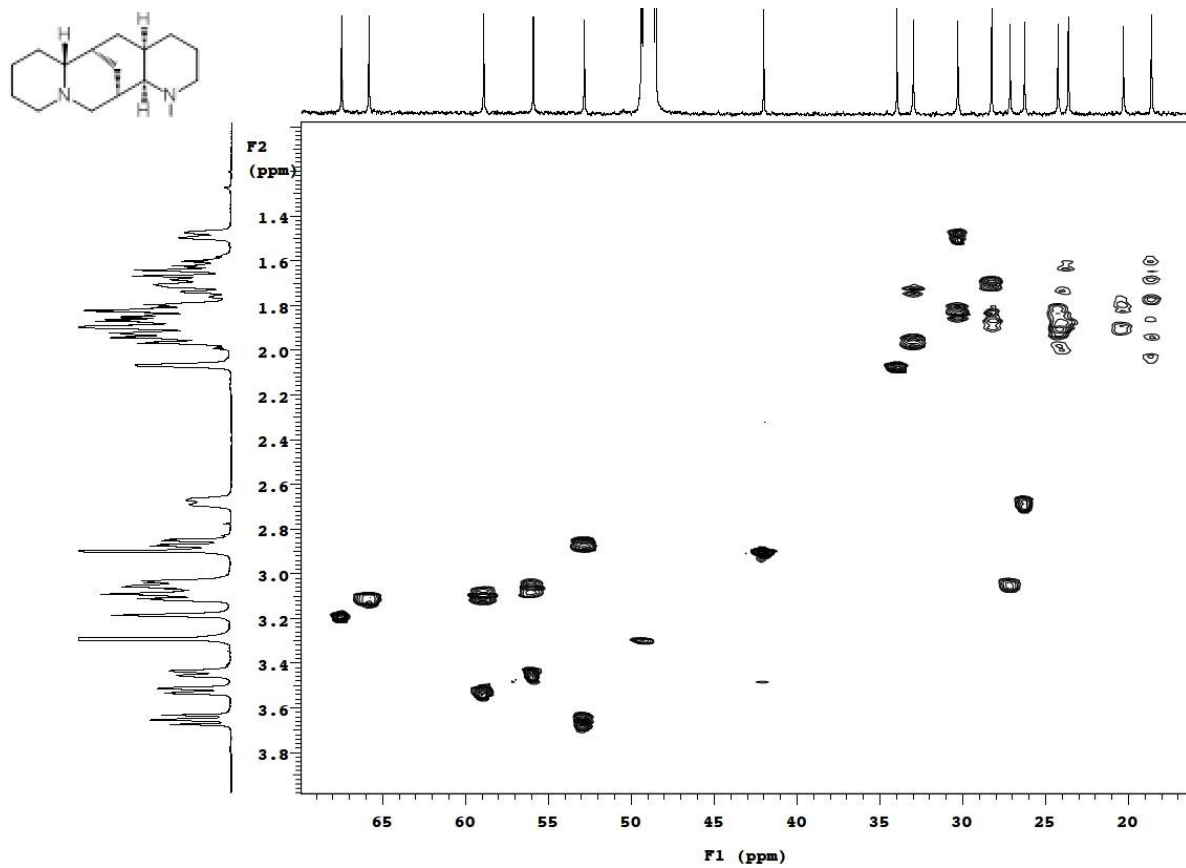

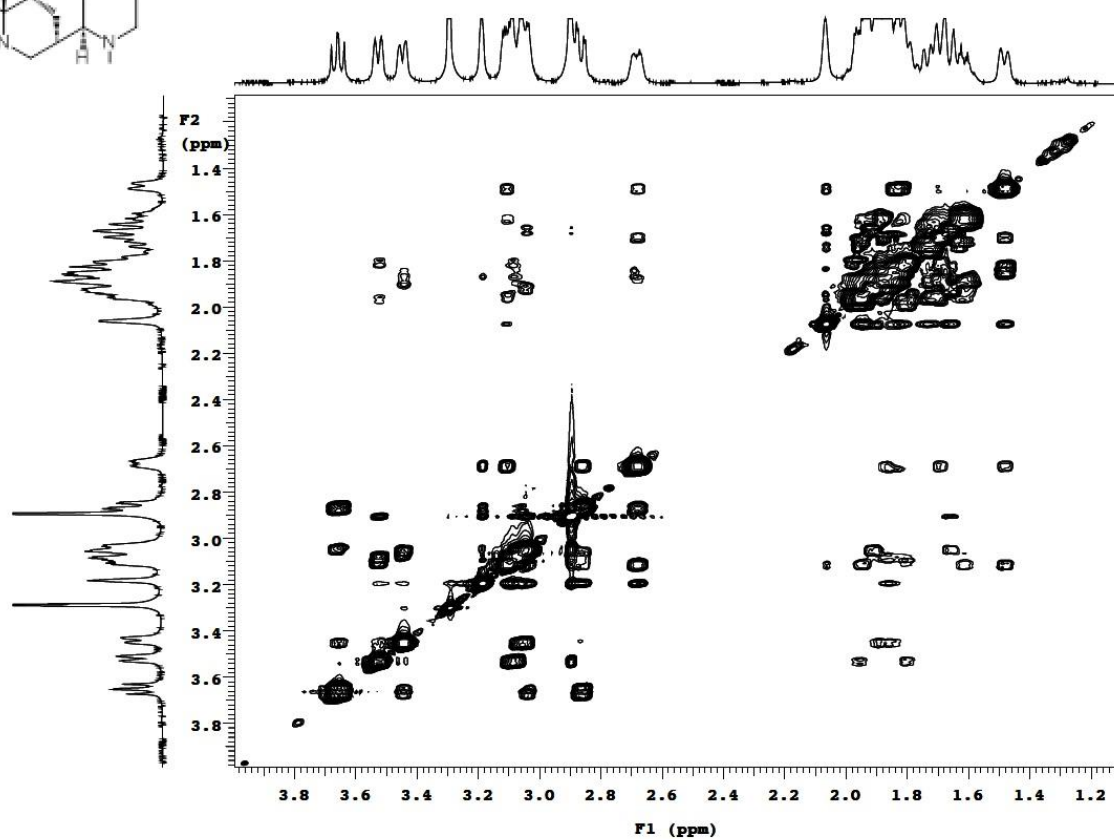

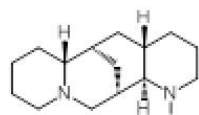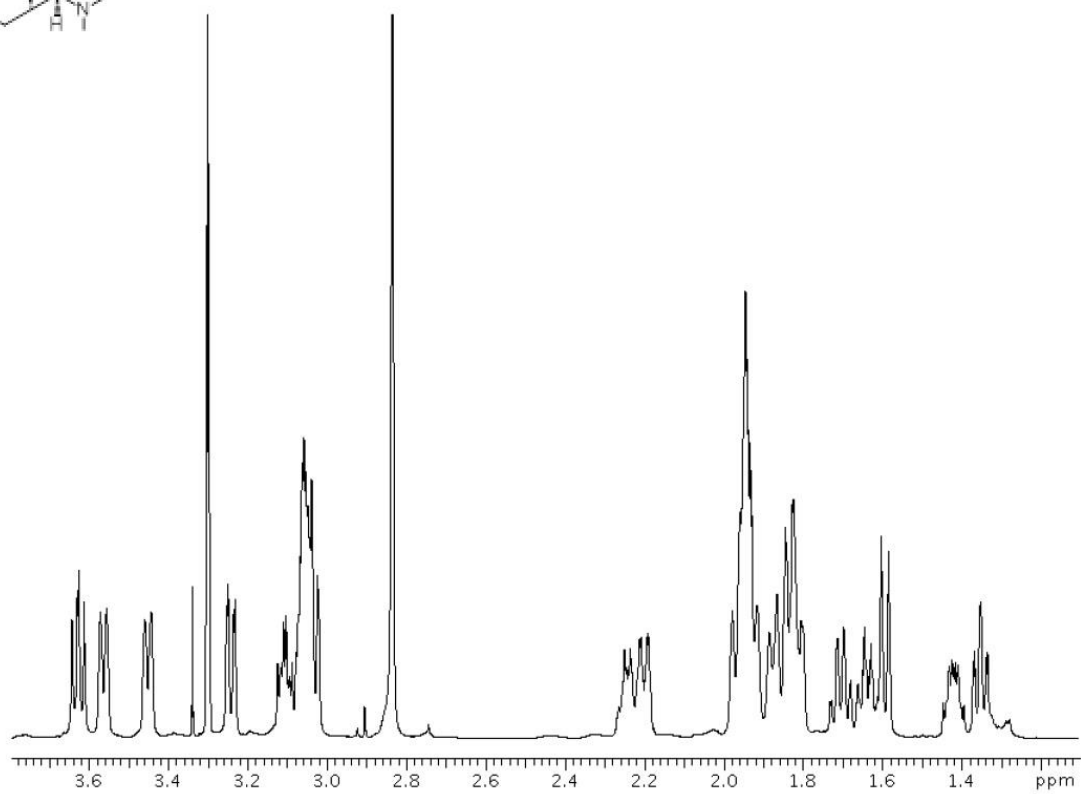

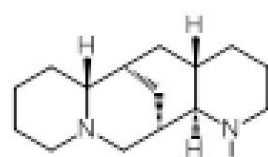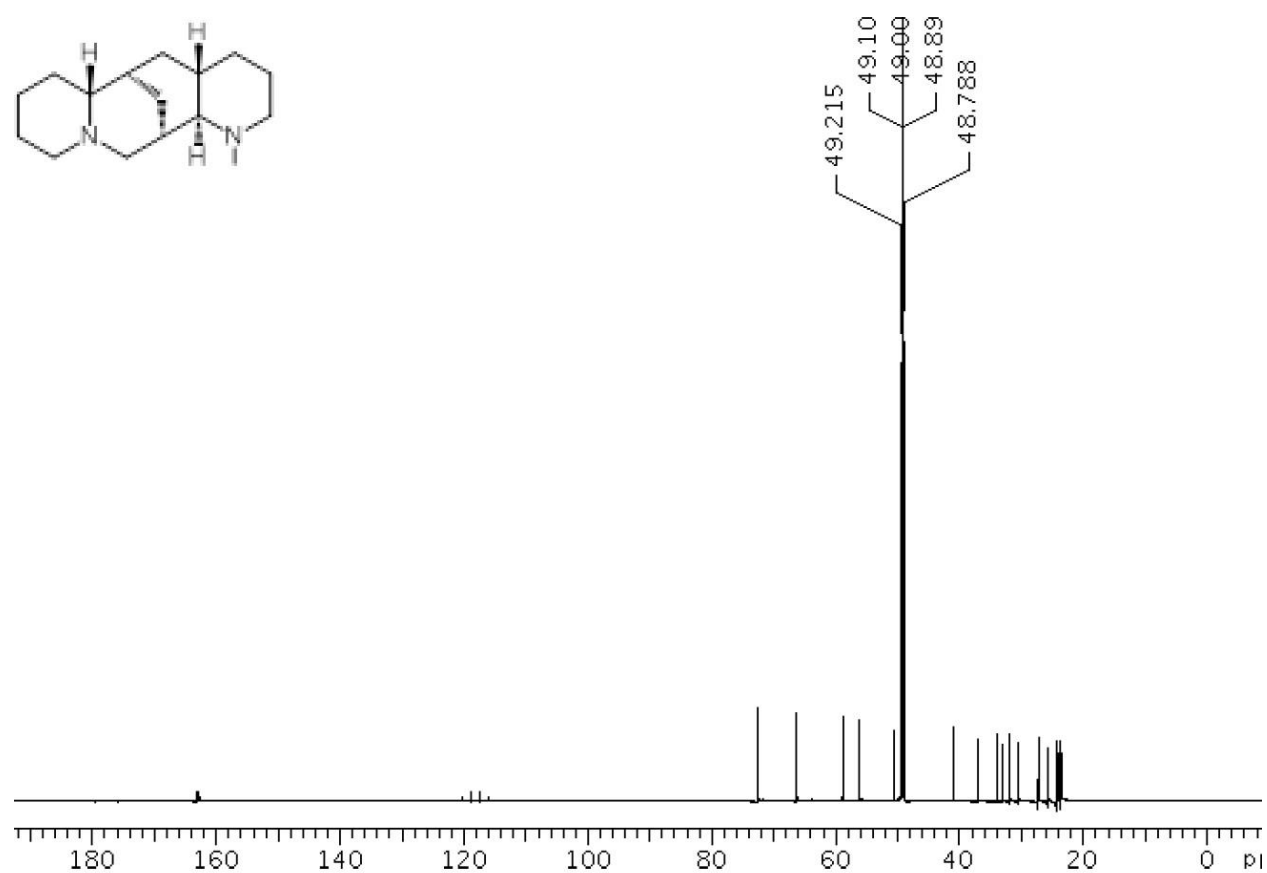

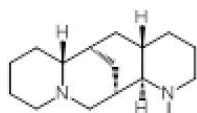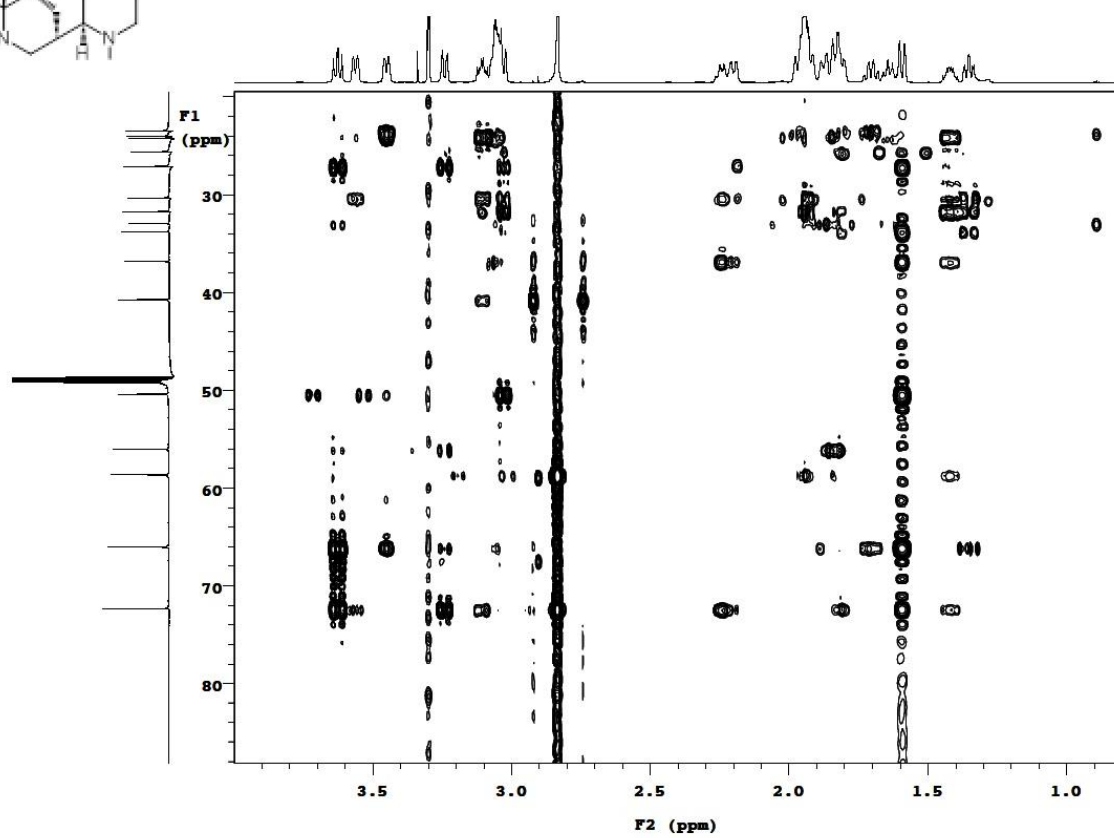



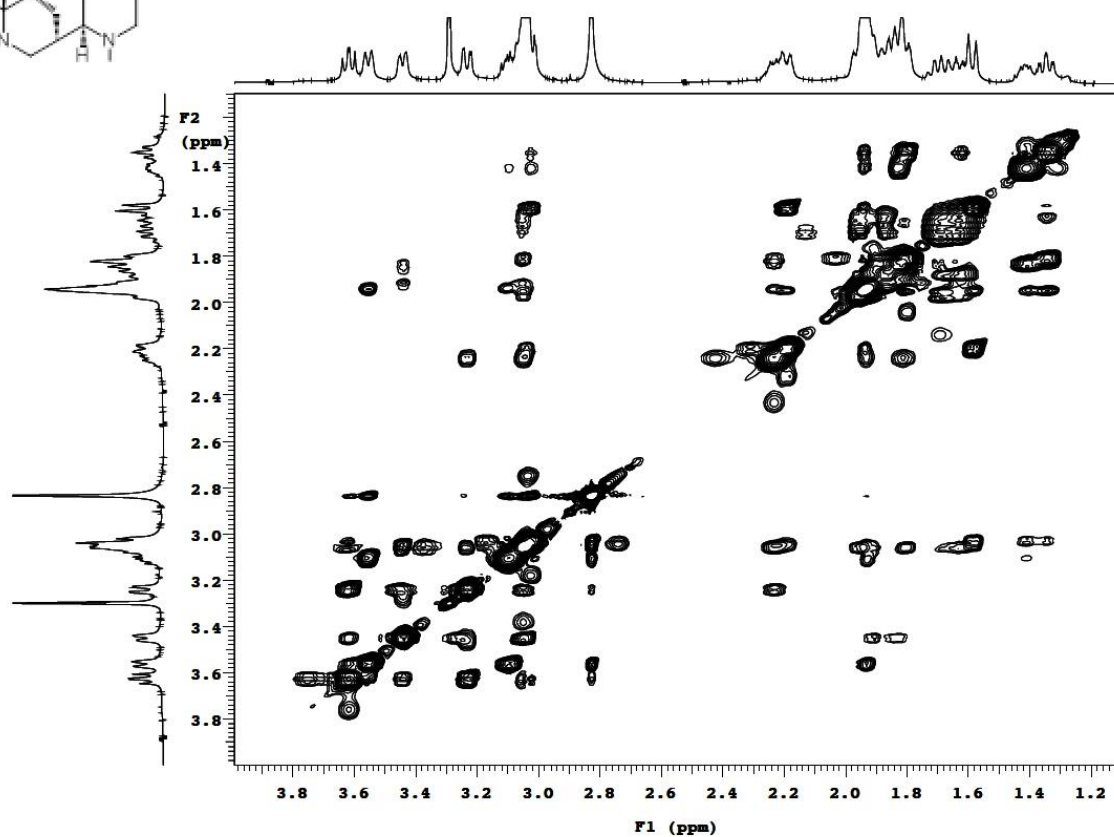

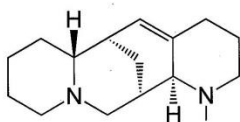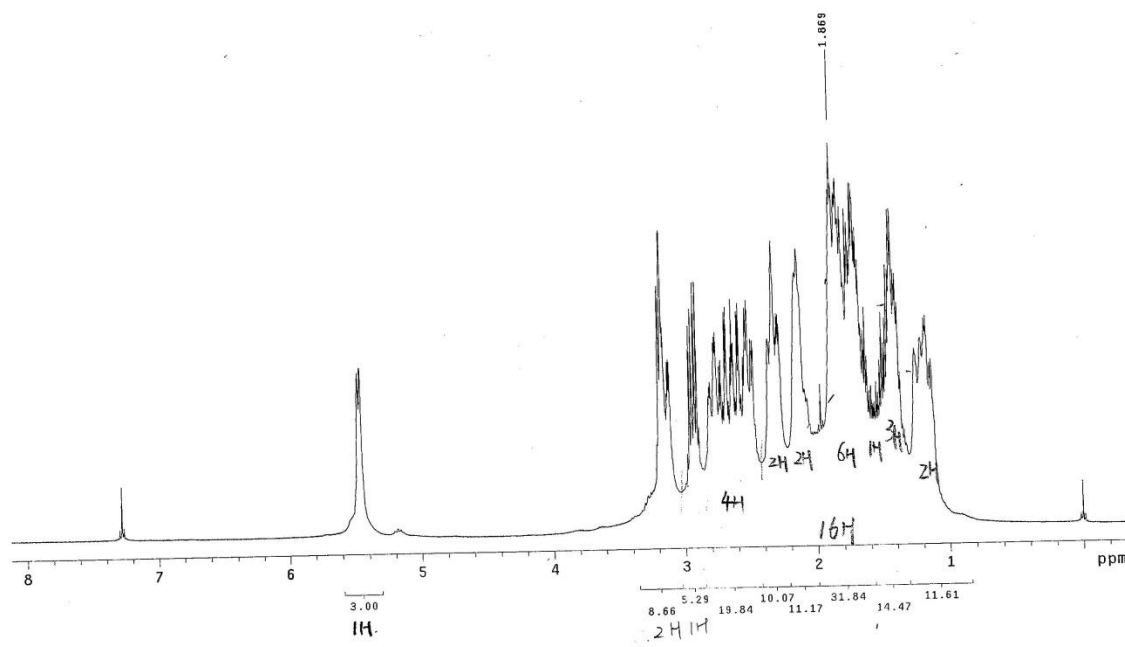

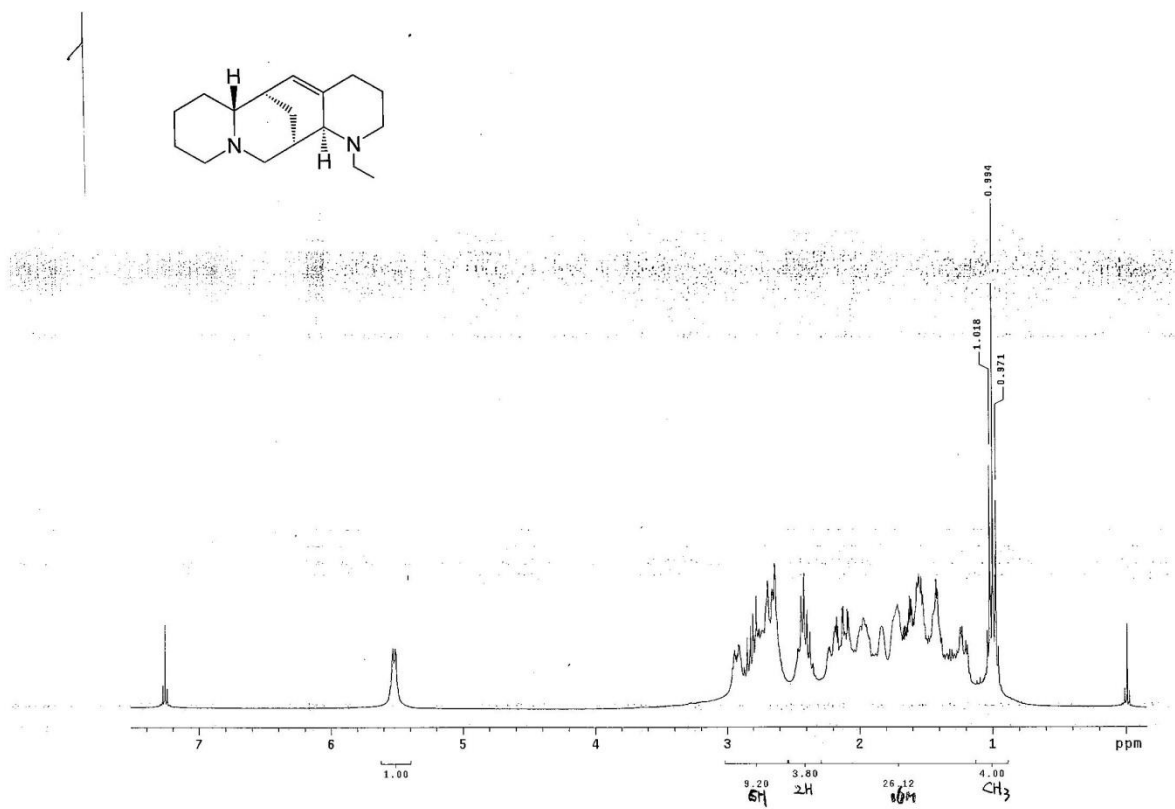

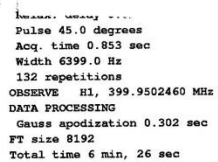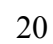

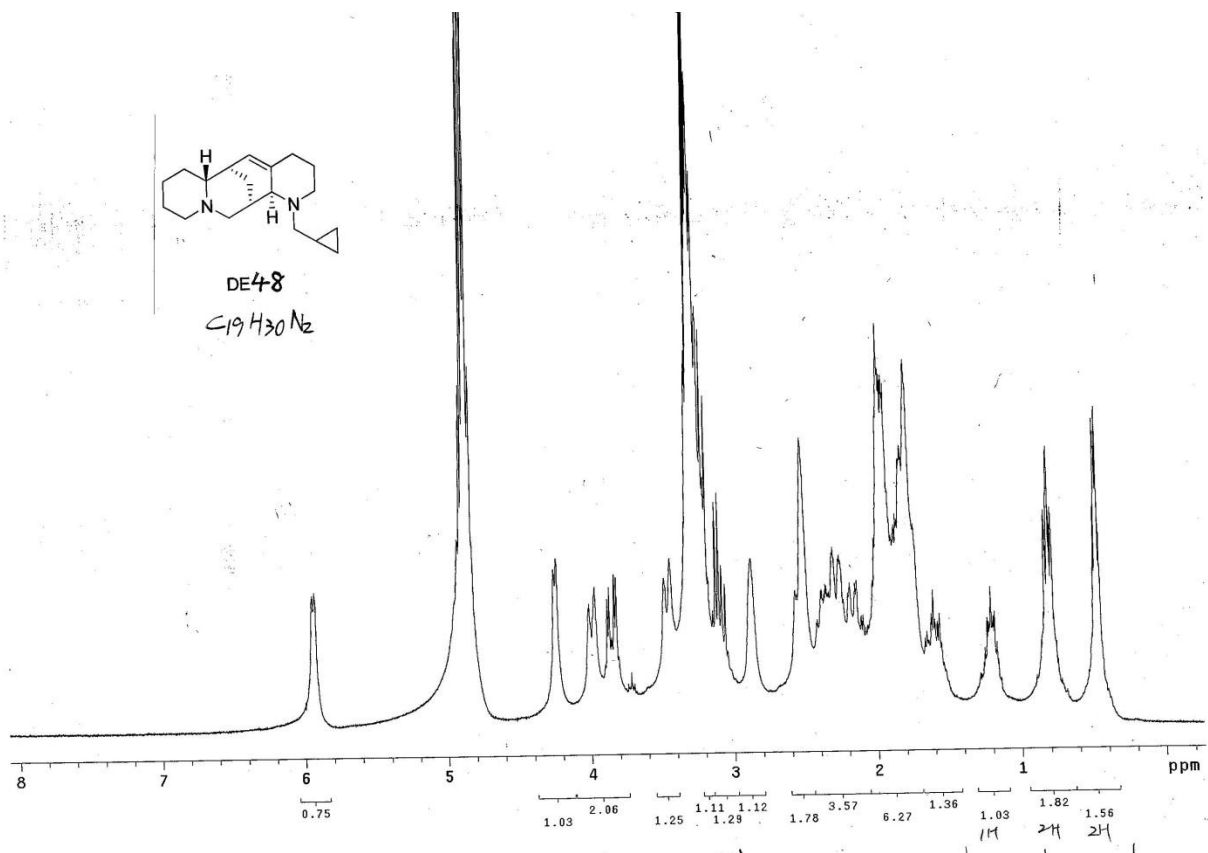

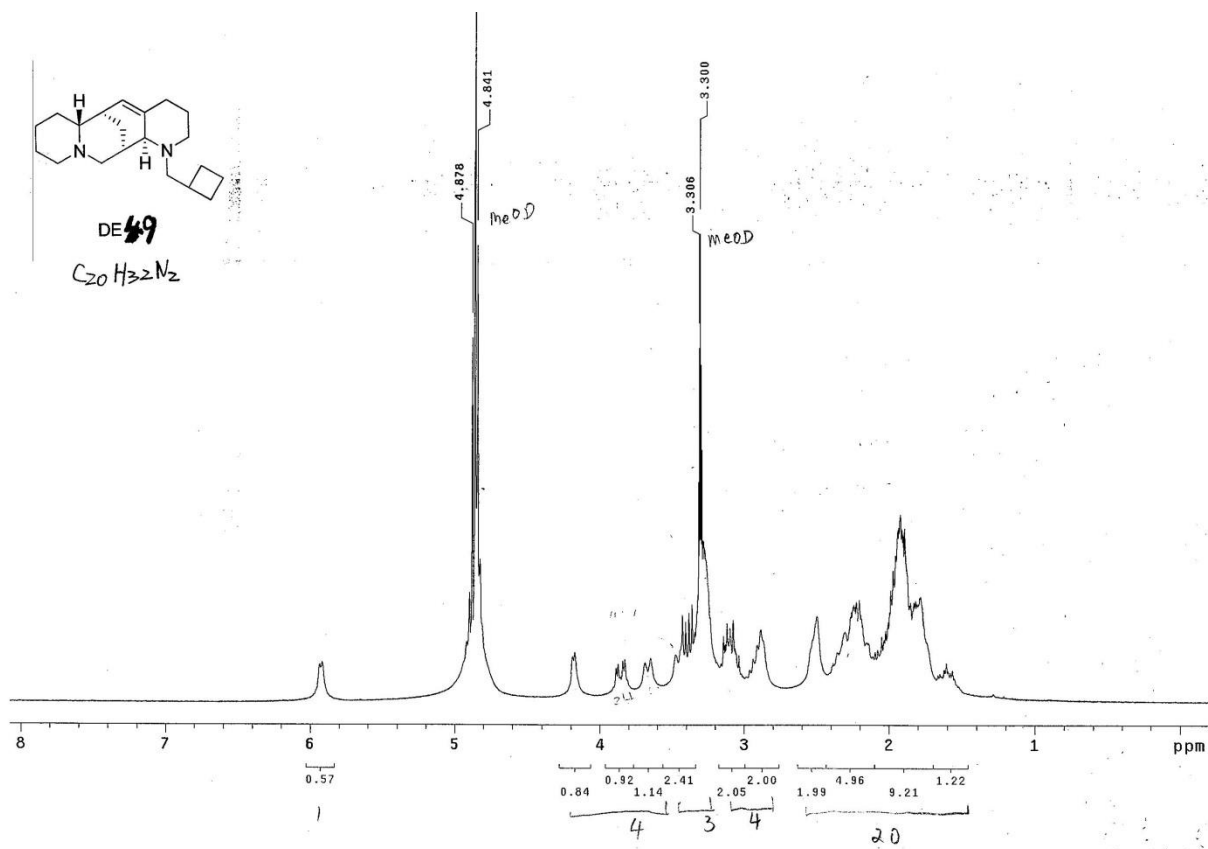

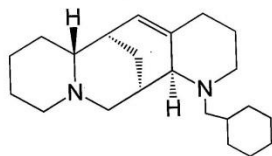

Relax. delay 0.020 sec  
 Pulse 45.0 degrees  
 Acq. time 0.853 sec  
 Width 6399.0 Hz  
 160 repetitions  
 OBSERVE H1, 399.9502460 MHz  
 DATA PROCESSING  
 Gauss apodization 0.302 sec  
 FT size 8192  
 Total time 6 min, 26 sec

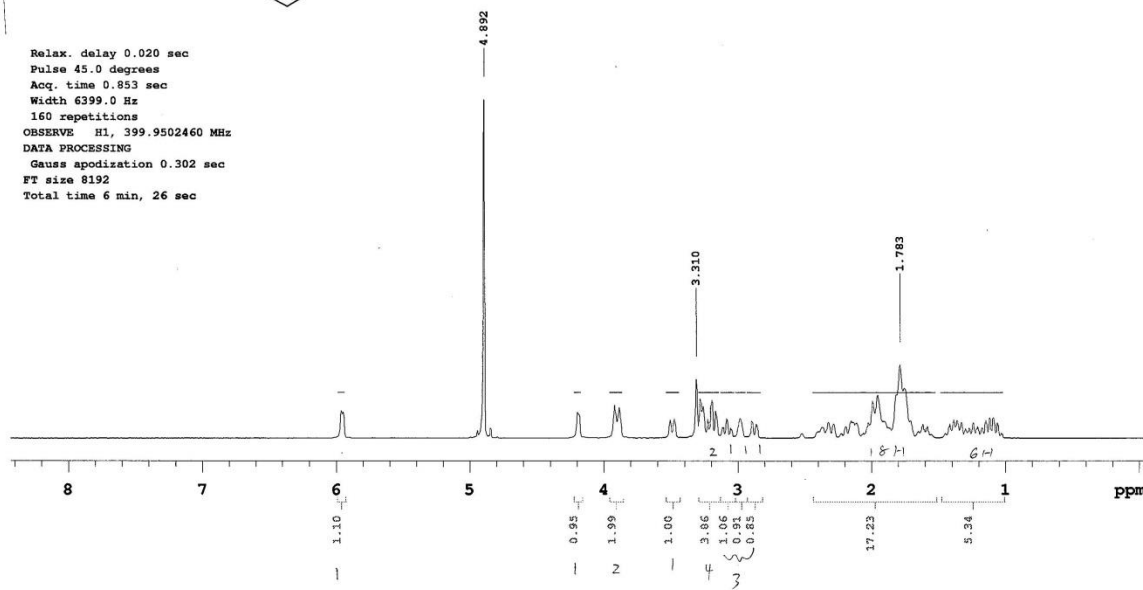

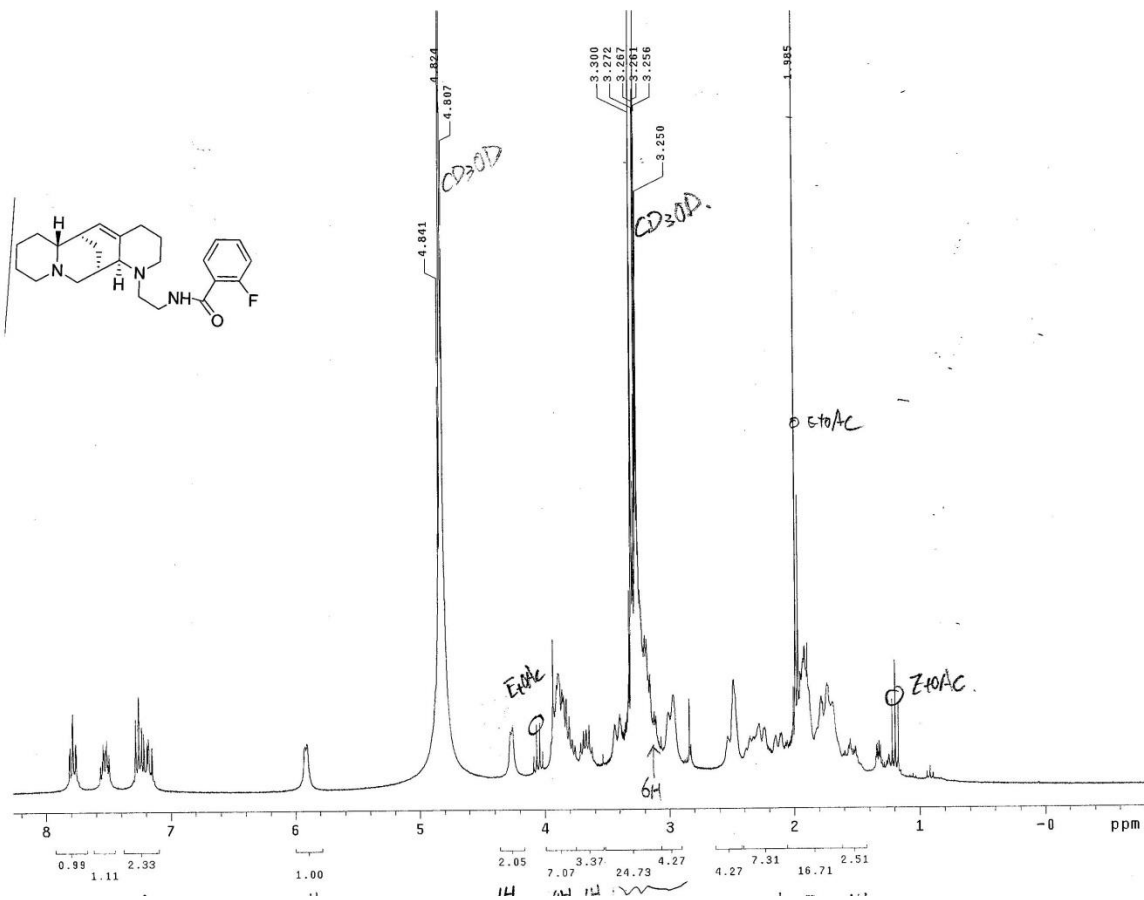



DE59-1-CD300-4-11-2013

File: xp

Pulse Sequence: s2pu1

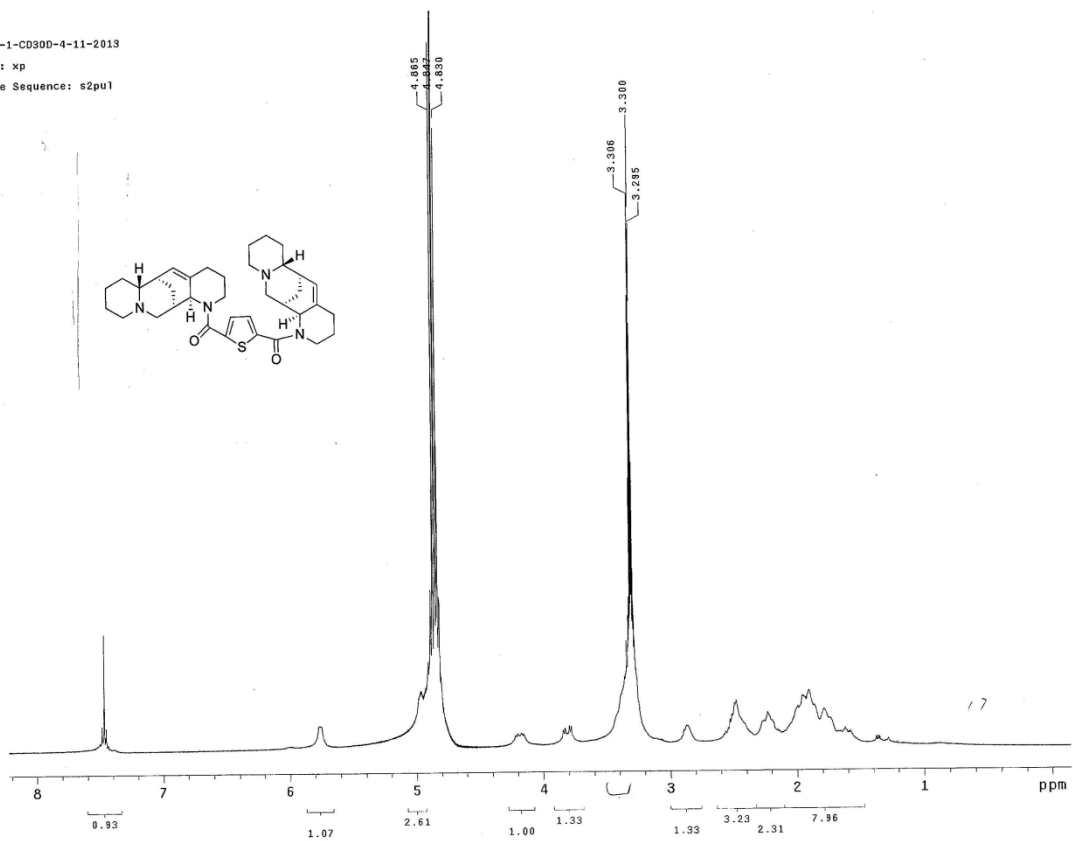

Supplement: Supplementary file 1 [file 3609213]
